# Supplementary material for: Single-crystal-to-single-crystal transformation of tetrathiafulvalene-based hydrogen-bonded organic frameworks
Source: Royal Society of Chemistry journal article supplement (doi:10.1039/d1ce00519g), 2021-01-01
Supplement: d1ce00519g1.pdf [file d1ce00519g1.pdf]

## Supporting information

# Single-crystal-to-single-crystal Transformation of Tetrathiafulvalene-Based Hydrogen-bonded organic frameworks

Xiang-Yu Gao,<sup>ab</sup> Yu-Lin Li,<sup>b</sup> Tian-Fu Liu,<sup>b</sup> Xin-Song Huang,<sup>\*b</sup> and Rong Cao<sup>\*ab</sup>

<sup>a</sup>School of Physical Science and Technology, ShanghaiTech University, Shanghai, 201210, China.

<sup>b</sup>State Key Laboratory of Structural Chemistry, Fujian Institute of Research on the Structure of Matter, Chinese Academy of Sciences, Fuzhou, Fujian, 350002, P. R.

\* Author for correspondence: [xshuang@fjirsm.ac.cn](mailto:xshuang@fjirsm.ac.cn), [rcao@fjirsm.ac.cn](mailto:rcao@fjirsm.ac.cn).

## TABLE OF CONTENTS

|                                                                                                                  |    |
|------------------------------------------------------------------------------------------------------------------|----|
| Experimental Section.....                                                                                        | 3  |
| 1.1 Synthesis of PFC-77.....                                                                                     | 3  |
| 1.2 Synthesis of PFC-78.....                                                                                     | 3  |
| 1.3 Synthesis of PFC-78.....                                                                                     | 3  |
| 1.4 Analysis of studied structures.....                                                                          | 3  |
| <b>Fig. S1.</b> Microscope image of PFC-77, PFC-78 and PFC-79.....                                               | 4  |
| <b>Fig. S2.</b> The transformation process from PFC-77 to PFC-78.....                                            | 4  |
| <b>Fig. S3.</b> The transformation process from PFC-78 to PFC-79.....                                            | 4  |
| <b>Fig. S4.</b> PXRD pattern of PFC-78 immersed in mother liquid of PFC-77 for 8 hours at 25 °C and 60 °C.....   | 5  |
| <b>Fig. S5.</b> PXRD pattern of PFC-77 heated at 75 °C under vacuum for 8 hours.....                             | 5  |
| <b>Fig. S6.</b> TGA curves of PFC-77, activated PFC-78 and PFC-79.....                                           | 6  |
| <b>Fig. S7</b> N <sub>2</sub> isotherm of MTV PFC-77, PFC-78 and PFC-79 at 77 K.....                             | 7  |
| <b>Fig. S8</b> PXRD patterns of PFC-78 immersed in CH <sub>2</sub> Cl <sub>2</sub> after increasing minutes..... | 7  |
| <b>Fig. S9</b> Torsion angle of a) PFC-77 b) PFC-78 c) PFC-79.....                                               | 8  |
| <b>Fig. S10.</b> <sup>1</sup> HNMR of H <sub>4</sub> TTFTB.....                                                  | 8  |
| Single-Crystal X-ray Crystallography.....                                                                        | 9  |
| <b>Table S1</b> Crystal data of the PFC-77, PFC-78 and PFC-79.....                                               | 10 |
| Cyclic voltammetry curve (CV).....                                                                               | 11 |

# Experimental Section

Unless otherwise mentioned, all reagents and solvents were purchased from commercial sources and used as received without further purification. Tetrathiafulvalene tetracarboxylic acid ( $H_4TTFTB$ ) was supplied by Shanghai Tensus Biotech. The material is an amorphous powdery substance. It was characterized by  $^1H$ NMR to verify its purity and the result is shown as Fig. S10.

## 1.1 Synthesis of PFC-77

Weigh 30 mg of  $H_4TTFTB$  into a vial, add 5 mL each of water and THF to dissolve  $H_4TTFTB$ . Without tightening the cap, put the vial in an oven at  $60^\circ C$  to allow the THF to gradually volatilize. After 72 h, dark brown-red crystals were obtained.

## 1.2 Synthesis of PFC-78

Immerse PFC-77 in acetone, PFC-78 can be obtained after 8 h.

## 1.3 Synthesis of PFC-78

Immerse PFC-77 or PFC-78 in  $CH_2Cl_2$ , and PFC-79 can be obtained within 10 minutes.

## 1.4 Analysis of studied structures

$^1H$ -NMR spectra were recorded on Bruker AVANCE III 400MHz spectrometers. Single crystal X-ray diffraction data was collected at 150K on an Bruker D8 Venture diffractometer equipped with Cu-K $\alpha$  radiation ( $\lambda = 0.71073 \text{ \AA}$ ). PXRD was performed on Rigaku Miniflex 600 Benchtop X-ray diffraction instrument. TGA was performed on a Seiko S-II instrument, and the dried crystalline samples were heated at a rate of  $5^\circ C/min$  up to  $800^\circ C$  and then cooled to room temperature under  $N_2$  atmosphere. The  $N_2$  gas isotherms of the samples were measured using ASAP 2460 from Micromeritics Co. Ltd.

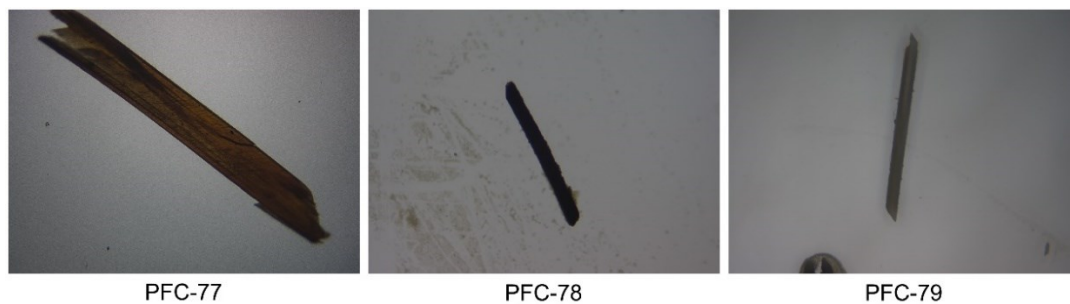

**Fig. S1.** Microscope image of PFC-77, PFC-78 and PFC-79.

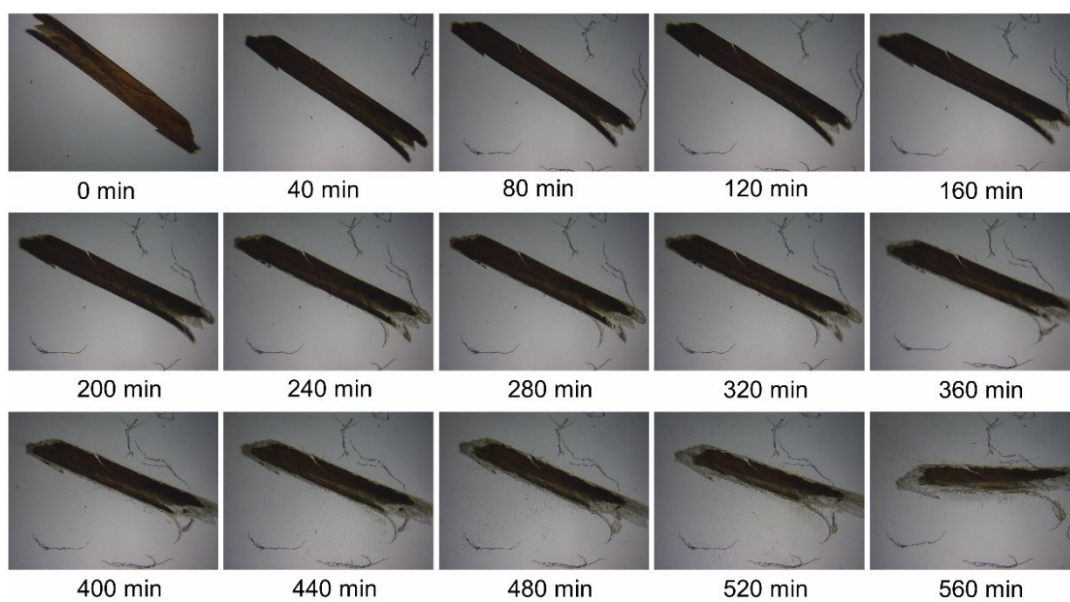

**Fig. S2.** The transformation process from PFC-77 to PFC-78.

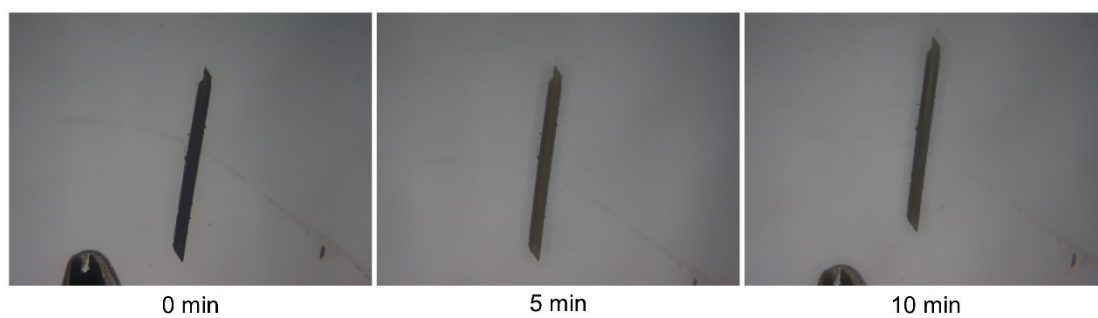

**Fig. S3.** The transformation process from PFC-78 to PFC-79.

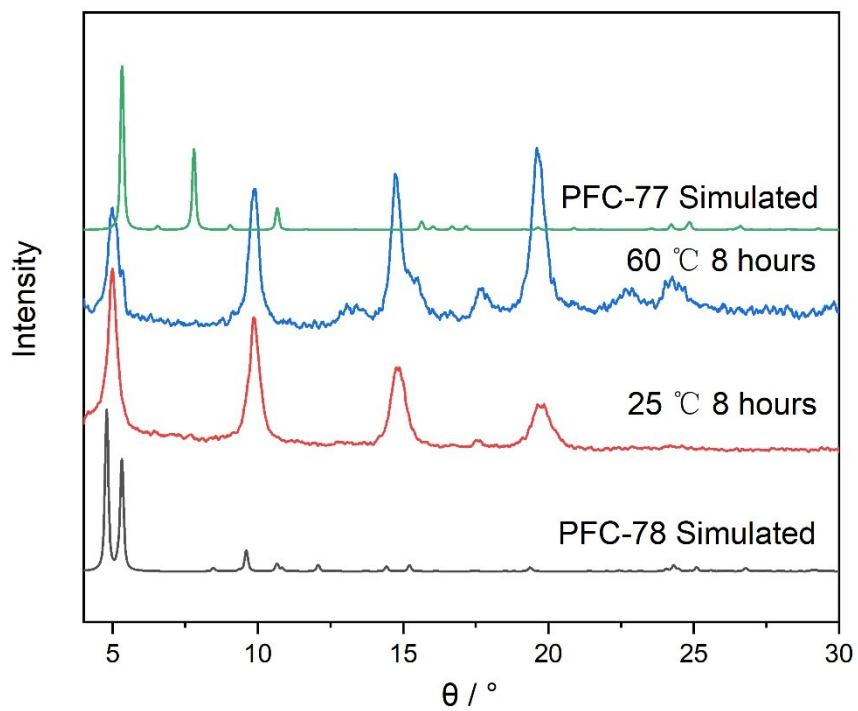

**Fig. S4.** PXRD pattern of PFC-78 immersed in mother liquid of PFC-77 for 8 hours at 25 °C and 60 °C.

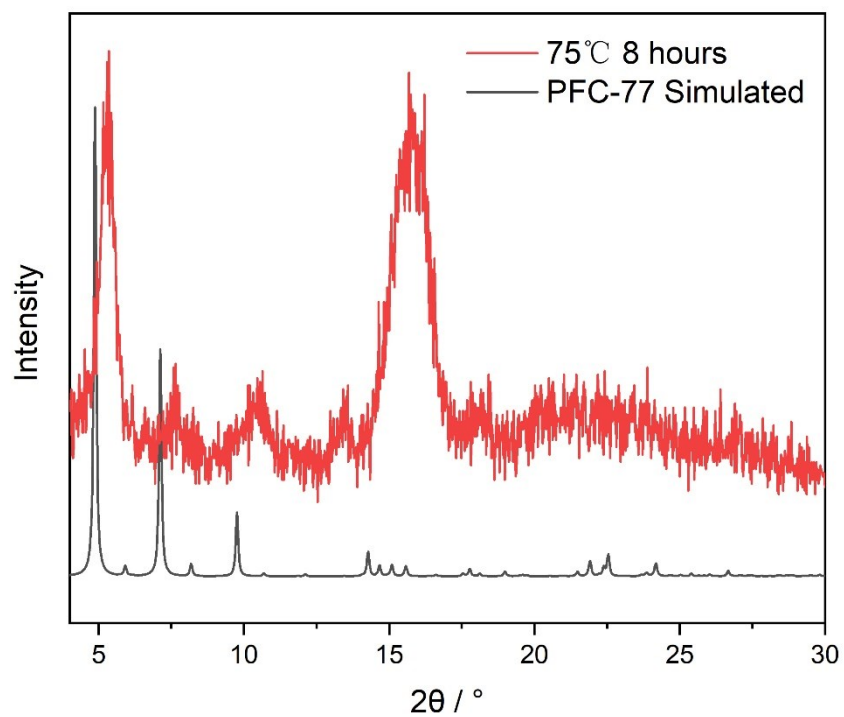

**Fig. S5.** PXRD pattern of PFC-77 heated at 75 °C under vacuum for 8 hours.

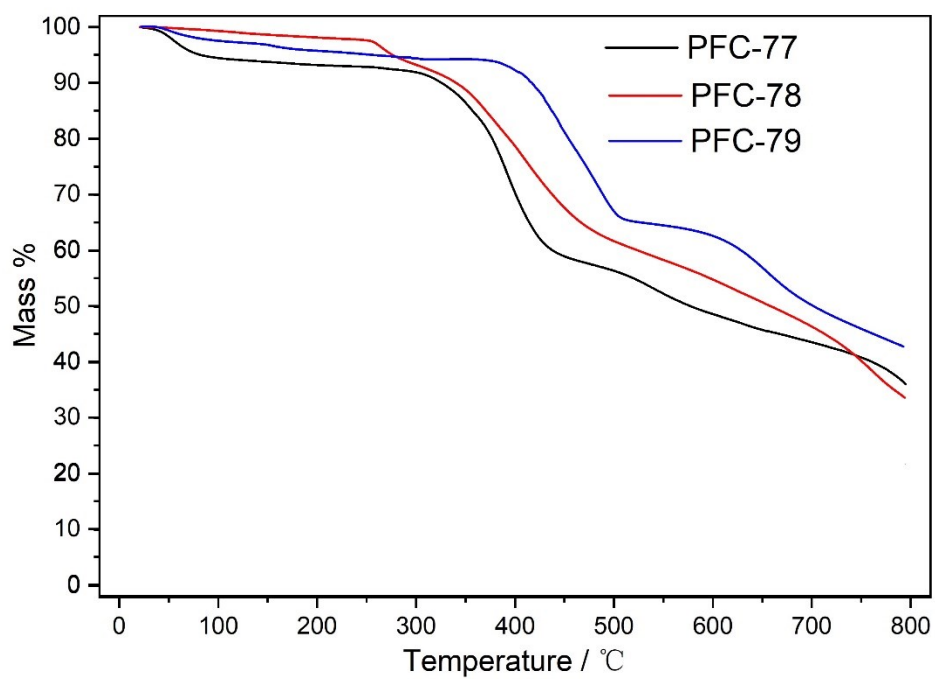

**Fig. S6.** TGA curves of PFC-77, activated PFC-78 and PFC-79.

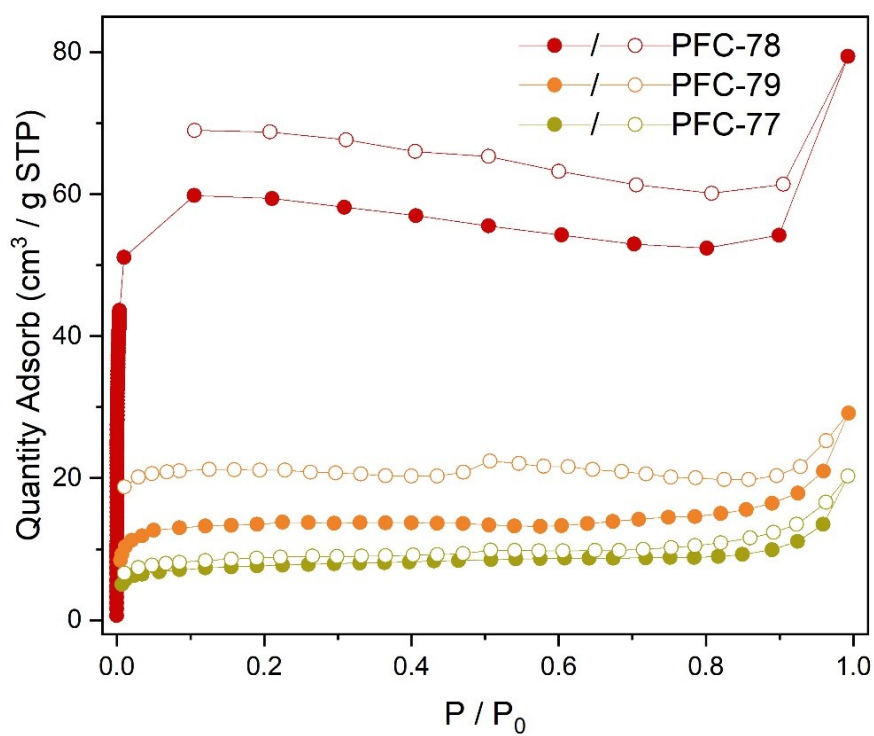

**Fig. S7** N<sub>2</sub> isotherm of MTV PFC-77, PFC-78 and PFC-79 at 77 K.

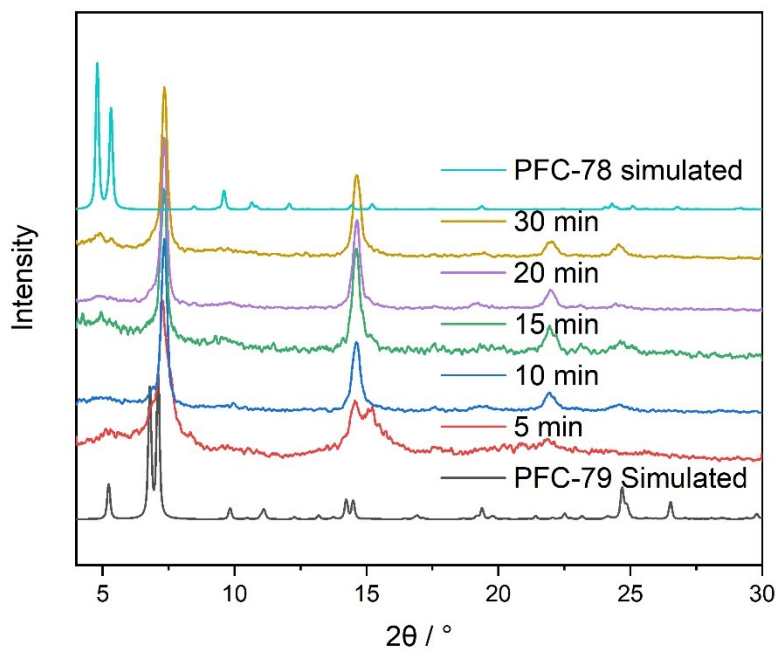

**Fig. S8** PXRD patterns of PFC-78 immersed in CH<sub>2</sub>Cl<sub>2</sub> after increasing minutes.

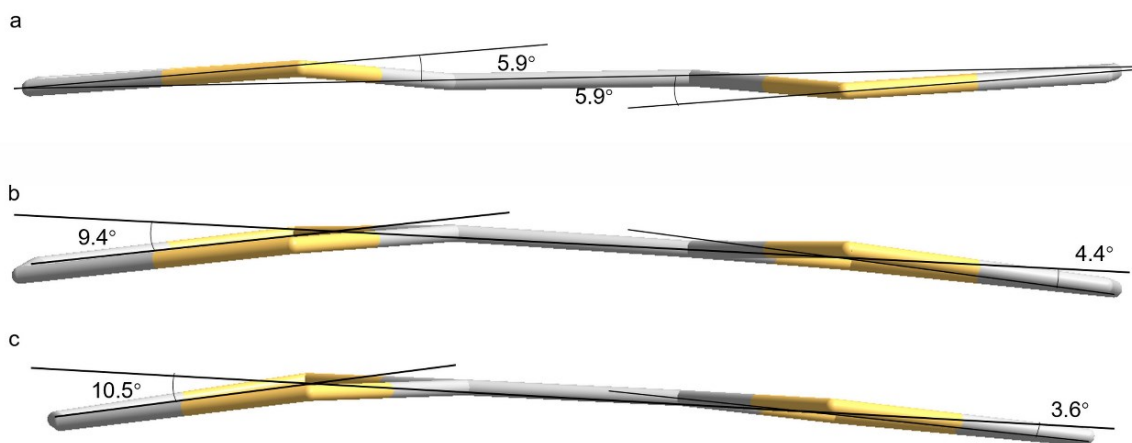

**Fig. S9** Torsion angle of a) PFC-77 b) PFC-78 c) PFC-79.

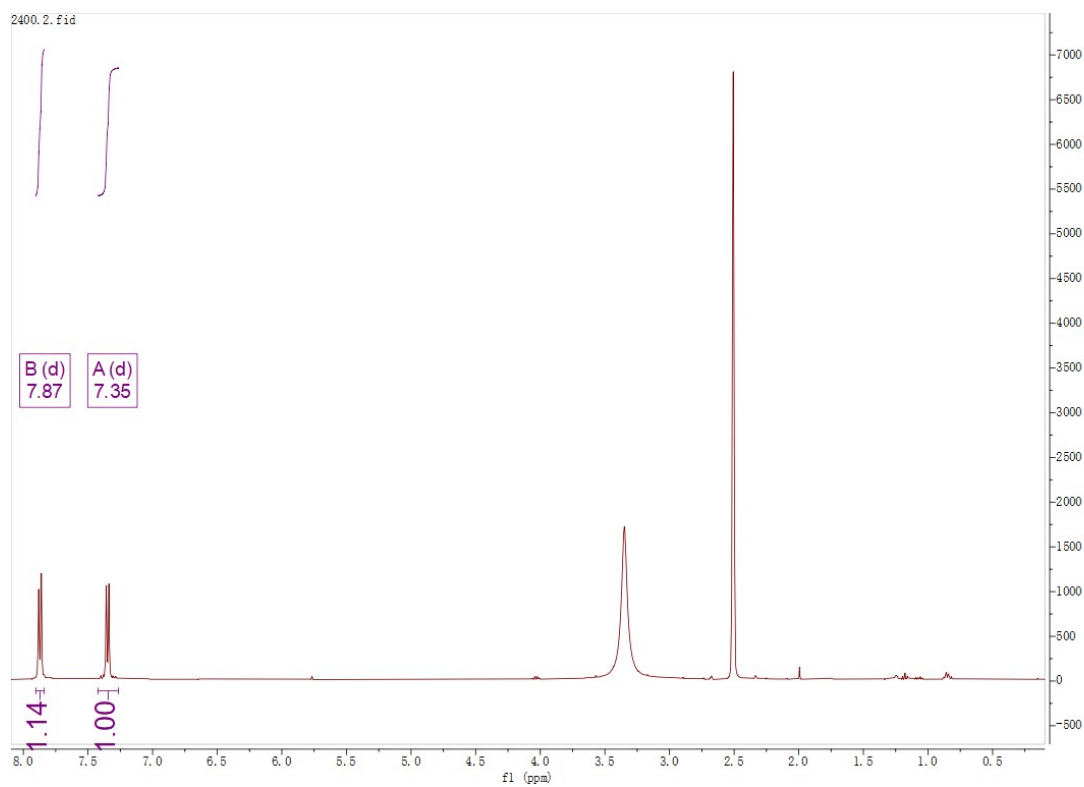

**Fig. S10.**  $^1\text{H}$ NMR of  $\text{H}_4\text{TTFTB}$



# Single-Crystal X-ray Crystallography

Single-crystal X-ray diffraction data was collected at 150 K on an Bruker D8 Venture diffractometer equipped with Mo-K $\alpha$  radiation ( $\lambda = 0.71073 \text{ \AA}$ ). The structure was solved by direct method and refined using SHELXL-2014 software package. In addition, the “SQUEEZE” command was employed because of the seriously disordered solvent molecules (H<sub>2</sub>O, CH<sub>2</sub>Cl<sub>2</sub> and acetone) in pores. Additional crystallographic data with CCDC reference numbers 2077900, 2077917 and 2077923 for PFC-77, PFC-78 and PFC-79 have been deposited within the Cambridge Crystallographic Data Center via [www.ccdc.cam.ac.uk/deposit](http://www.ccdc.cam.ac.uk/deposit). Crystal data are summarized in Table S1.

**Table S1** Crystal data of the PFC-77, PFC-78 and PFC-79

| Identification code                         | PFC-77                                                        | PFC-78                                                        | PFC-79                                                        |
|---------------------------------------------|---------------------------------------------------------------|---------------------------------------------------------------|---------------------------------------------------------------|
| Empirical formula                           | C <sub>17</sub> H <sub>10</sub> O <sub>4</sub> S <sub>2</sub> | C <sub>34</sub> H <sub>20</sub> O <sub>8</sub> S <sub>4</sub> | C <sub>34</sub> H <sub>20</sub> O <sub>8</sub> S <sub>4</sub> |
| Formula weight                              | 342.37                                                        | 684.74                                                        | 684.74                                                        |
| Temperature/K                               | 140.15                                                        | 149.99                                                        | 149.99                                                        |
| Crystal system                              | triclinic                                                     | triclinic                                                     | triclinic                                                     |
| Space group                                 | P-1                                                           | P-1                                                           | P-1                                                           |
| a/Å                                         | 5.778(3)                                                      | 8.301(7)                                                      | 8.4537(17)                                                    |
| b/Å                                         | 13.713(7)                                                     | 18.954(18)                                                    | 14.128(3)                                                     |
| c/Å                                         | 16.811(8)                                                     | 20.558(15)                                                    | 18.021(4)                                                     |
| α/°                                         | 81.532(19)                                                    | 114.88(5)                                                     | 106.291(9)                                                    |
| β/°                                         | 81.28(2)                                                      | 96.22(6)                                                      | 97.991(9)                                                     |
| γ/°                                         | 86.70(2)                                                      | 95.19(7)                                                      | 103.267(10)                                                   |
| Volume/Å <sup>3</sup>                       | 1301.4(11)                                                    | 2884(4)                                                       | 1962.5(7)                                                     |
| Z                                           | 2                                                             | 2                                                             | 2                                                             |
| ρ <sub>calc</sub> /cm <sup>3</sup>          | 0.874                                                         | 0.789                                                         | 1.159                                                         |
| μ/mm <sup>-1</sup>                          | 0.214                                                         | 0.194                                                         | 0.284                                                         |
| F(000)                                      | 352                                                           | 704                                                           | 704                                                           |
| Crystal size/mm <sup>3</sup>                | 0.3 × 0.2 × 0.1                                               | 1.0 × 0.2 × 0.1                                               | 1 × 0.6 × 0.6                                                 |
| Radiation                                   | MoKα (λ = 0.71073)                                            | MoKα (λ = 0.71073)                                            | MoKα (λ = 0.71073)                                            |
| 2θ range for data collection/°              | 6.012 to 45.446                                               | 4.318 to 37.918                                               | 4.826 to 41.632                                               |
| Index ranges                                | -6 ≤ h ≤ 6, -14 ≤ k ≤ 14, -18 ≤ l ≤ 18                        | -7 ≤ h ≤ 7, -17 ≤ k ≤ 17, -18 ≤ l ≤ 18                        | -8 ≤ h ≤ 8, -14 ≤ k ≤ 14, -18 ≤ l ≤ 18                        |
| Reflections collected                       | 8974                                                          | 13491                                                         | 12077                                                         |
| Independent reflections                     | 3487 [R <sub>int</sub> = 0.0772, R <sub>sigma</sub> = 0.1183] | 4544 [R <sub>int</sub> = 0.1408, R <sub>sigma</sub> = 0.1413] | 4074 [R <sub>int</sub> = 0.1757, R <sub>sigma</sub> = 0.1751] |
| Data/restraints/parameters                  | 3487/1/113                                                    | 4544/55/200                                                   | 4074/50/418                                                   |
| Goodness-of-fit on F <sup>2</sup>           | 1.395                                                         | 1.882                                                         | 1.442                                                         |
| Final R indexes [I ≥ 2σ (I)]                | R <sub>1</sub> = 0.1420, wR <sub>2</sub> = 0.4046             | R <sub>1</sub> = 0.1960, wR <sub>2</sub> = 0.4930             | R <sub>1</sub> = 0.1693, wR <sub>2</sub> = 0.4086             |
| Final R indexes [all data]                  | R <sub>1</sub> = 0.1810, wR <sub>2</sub> = 0.4283             | R <sub>1</sub> = 0.2800, wR <sub>2</sub> = 0.5540             | R <sub>1</sub> = 0.2913, wR <sub>2</sub> = 0.4897             |
| Largest diff. peak/hole / e Å <sup>-3</sup> | 0.72/-0.51                                                    | 1.61/-0.84                                                    | 0.71/-0.74                                                    |

## Cyclic voltammetry curve (CV)

The cyclic voltammetry (CV) test is done on the rotating ring disk electrode system. 5 mg of the sample to be tested was soaked in 1 mL of acetone and sonicated for 30 min for dispersion. Then 100  $\mu\text{L}$  of naphthol solution was added to the mixed solution. Leave a space of 1  $\text{cm}^2$  at both ends on the 1 cm wide conductive glass, and brush nail polish on the remaining area to isolate the conductive glass from contacting the electrolyte. 20  $\mu\text{L}$  pipette was used to drop the dispersed sample mixture evenly on a blank area of the conductive glass and wait for it to dry. Repeat five times. The electrolyte used are 250 mL each of 0.1 M tetrabutylammonium hexafluorophosphate ( $\text{TBAPF}_6$ ) acetonitrile solution for PFC-77 and PFC-78 or 0.1 M tetrabutylammonium hexafluorophosphate ( $\text{TBAPF}_6$ ) trichloromethane solution for PFC-79.
